# Supplementary material for: Ketamine and selective activation of parvalbumin interneurons inhibit stress-induced dendritic spine elimination
Source: PubMed Central journal article supplement (PMC6288154; doi:10.1038/s41398-018-0321-5), 2018-12-10
Supplement: 41398_2018_321_MOESM1_ESM.pdf [file 41398_2018_321_MOESM1_ESM.pdf]

## Supplementary information

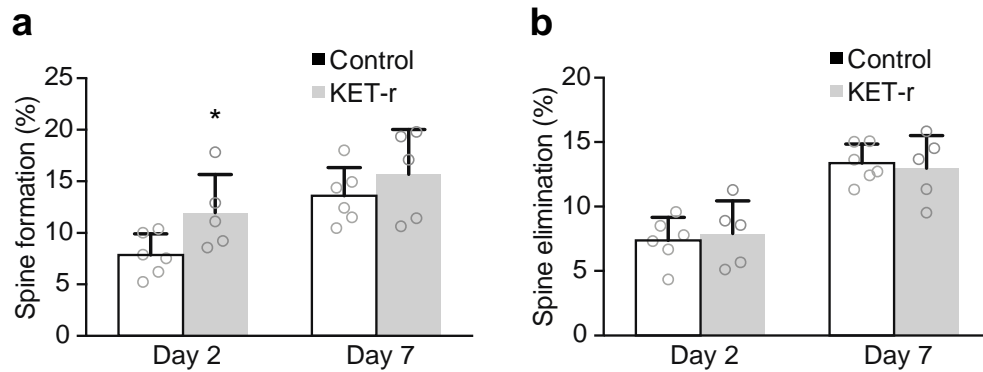

### Supplementary Figure 1

#### Ketamine treatment has no effect on spine elimination in non-stress mice.

(a, b) Rate of spine formation and elimination in control (n = 6, 929 spines) and KET-r (n = 5, 588 spines) groups under non-stress condition. Repeated ketamine treatment (KET-r) increased spine formation at day 2 ( $P = 0.0465$ ) but not at day 7 ( $P = 0.3666$ ) compared to control, and had no effect on spine elimination. Student's  $t$  test. Data are presented in mean  $\pm$  sd.

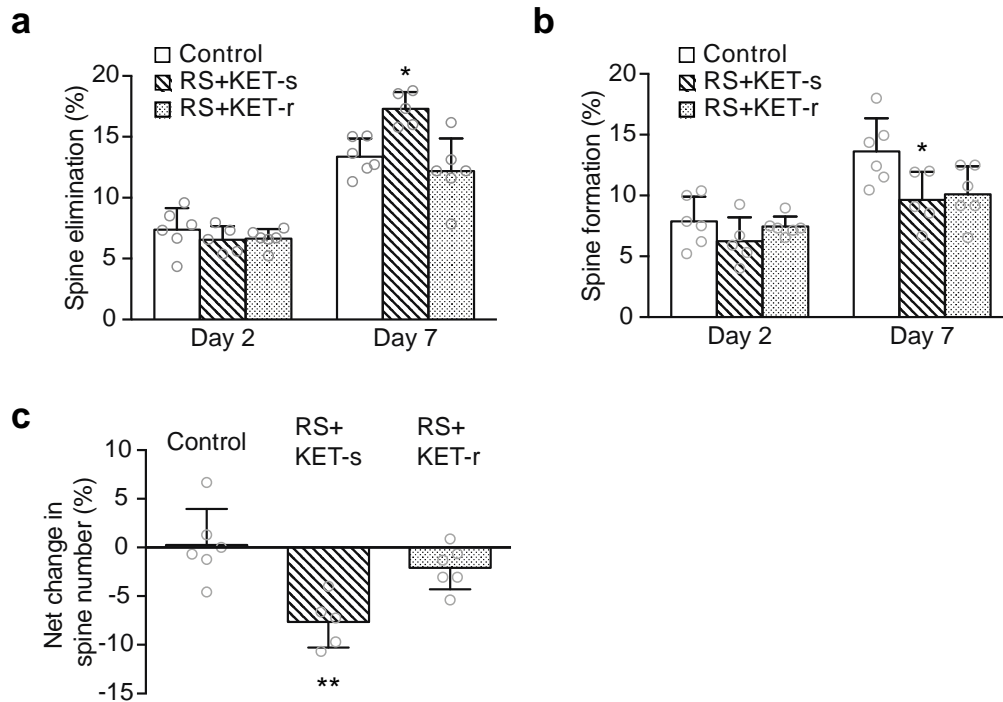

**Supplementary Figure 2**

**Repeated ketamine treatment restores RS-induced dendritic spine loss to non-stressed control level.**

(a, b) Rate of spine elimination and spine formation in non-stressed control, RS + KET-s, RS + KET-r groups. There was no significant difference in spine elimination and formation between control and RS + KET-r groups at both day 2 and day 7. RS + KET-s had a significantly higher elimination rate and a significantly lower formation rate compared to control at day 7 but not at day 2. (Elimination: Day 2,  $P = 0.5291$ ,  $F_{(2,14)} = 0.6664$ ; day 7,  $P = 0.0023$ ,  $F_{(2,14)} = 9.681$ . Formation: Day 2,  $P = 0.2885$ ,  $F_{(2,14)} = 1.360$ ; day 7,  $P < 0.0312$ ,  $F_{(2,14)} = 4.489$ .) (c) Net change in dendritic spine number after 7 days of RS. There was no significant difference between control and RS + KET-r groups in the net change in spine number, while RS + KET-s showed a significant loss in number of dendritic spines compared to control.  $P = 0.0019$ ,  $F_{(2,14)} = 10.19$ . Control:  $n = 6$ , 929 spines. RS + KET-s:  $n = 5$ , 728 spines. RS + KET-r:  $n = 6$ , 892 spines. \* $P < 0.05$ , \*\* $P < 0.01$  compared to control, one-way ANOVA followed by post-hoc Tukey's test. Data are presented in mean  $\pm$  sd.

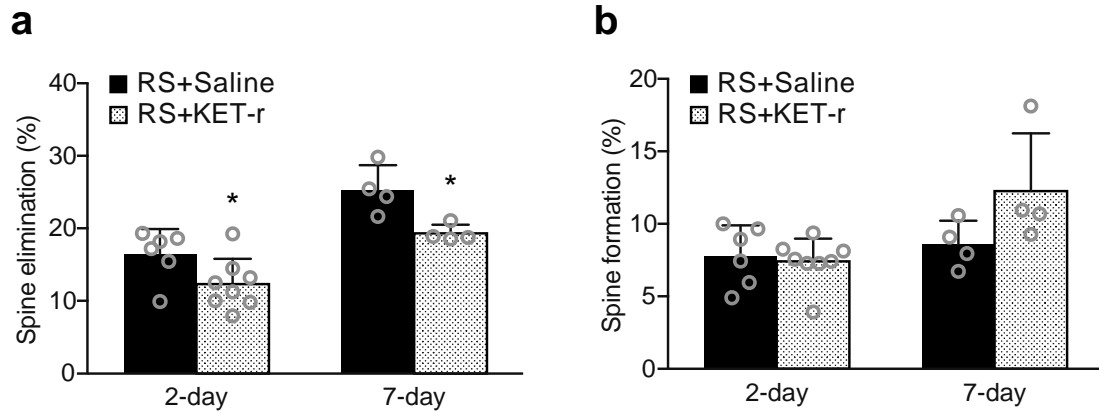

### Supplementary Figure 3

#### Ketamine counteracts stress-induced spine elimination under isoflurane anesthesia

(**a, b**) Rate of spine elimination and spine formation in RS + Saline (Day 2:  $n = 6$ , 721 spines; day 7:  $n = 4$ , 518 spines) and RS + KET-r (Day 2:  $n = 8$ , 1107 spines; day 7:  $n = 4$ , 598 spines) groups under isoflurane anesthesia. Elimination: day 2:  $P = 0.0480$ , Student's  $t$  test; day 7:  $P = 0.0286$ , Mann–Whitney  $U$ -test. \* $P < 0.05$ , compared to RS + Saline. Data are presented in mean  $\pm$  sd.

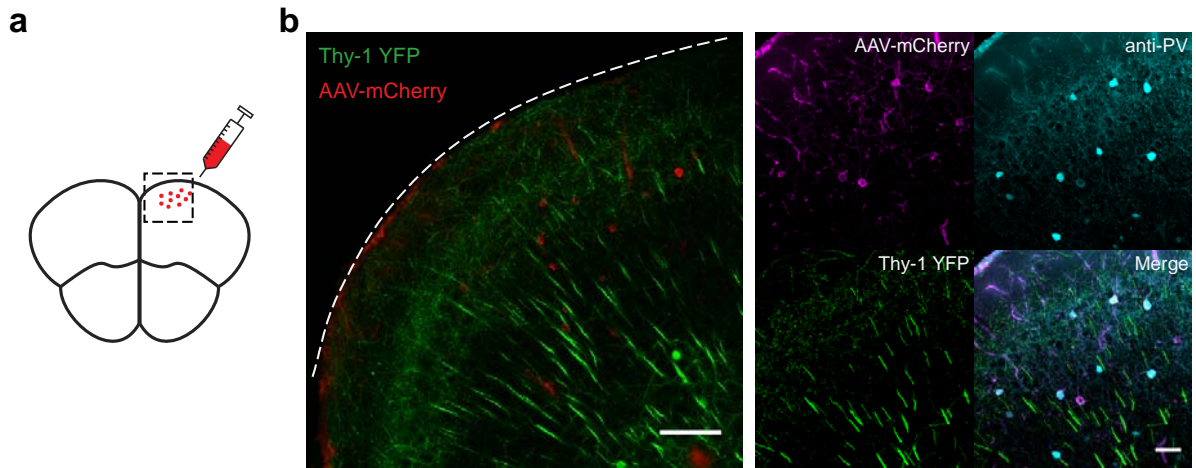

#### Supplementary Figure 4

#### Confocal images showing expression of DREADD specifically in PV interneurons in L2/3 of the FrA

(a) Schematic showing site of AAV injection at FrA. (b) Left: Representative confocal image of a coronal section taken from the region indicated by the dashed box in (a) showing DREADD-expressing neurons in the FrA. mCherry (red) indicates expression of DREADD vectors in L2/3 and YFP (green) is expressed in apical dendrites of layer 5 pyramidal neurons. Scale bar, 120  $\mu\text{m}$ . Right: Images showing the selective expression of DREADD vectors (magenta) in PV interneurons (cyan). Scale bar, 50  $\mu\text{m}$ .

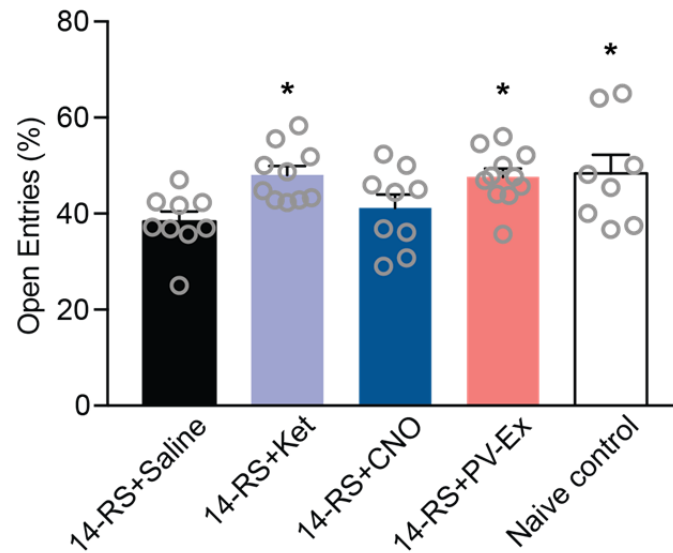

### Supplementary Figure 5

#### **PV interneurons excitation mimics ketamine's anxiolytic effect in stressed mice in EPM**

Graph showing the percentage of entries into open arms in EPM in the 14-RS + Saline (n = 9), 14-RS + Ket (n = 10), 14-RS + CNO (n = 9) and 14-RS + PV-Ex (n = 11) and naïve control (n = 8) groups. 14-RS mice were restraint stressed daily for 14 days from P30, and tested on the day following the last day of stress (P44). For PV-Ex, AAV carrying vector for Cre-dependent hM3D(Gq) was injected bilaterally into FrA of *PV-Cre/Thy1-YFPH* mice at P20. Saline, ketamine or CNO was administered one hour before the start of EPM test.  $P = 0.0140$ ,  $F_{(4, 42)} = 3.547$ , one-way ANOVA.  $*P < 0.05$  compared to 14-RS + Saline, post-hoc Dunnett's test. Data are presented in mean ± sem.

**Supplementary Table 1.** Analysis details for dendritic spine imaging, including the number of dendritic spine and dendritic branch analyzed, and the number and sex of animal used in different groups at different imaging intervals.

| Imaging interval (days) | Group                  | Number of analyzed dendritic spines, dendritic branches on Day 0 | Number of mice (Male, Female) |
|-------------------------|------------------------|------------------------------------------------------------------|-------------------------------|
| 2/7                     | Control                | 929, 60                                                          | 6 (3,3)                       |
| 2/7                     | RS                     | 910, 67                                                          | 6 (3,3)                       |
| 7                       | 2d RS+5d Recovery      | 504,37                                                           | 4 (3,1)                       |
| 2/7                     | RS+Saline              | 774, 52                                                          | 5 (1,4)                       |
| 2/7                     | RS+Ket-s               | 728, 48                                                          | 5 (2,3)                       |
| 2/7                     | RS+Ket-r               | 892,65                                                           | 6 (3,3)                       |
| 2/7                     | Ket-r                  | 588, 47                                                          | 5 (3,2)                       |
| 2/4                     | Pre-stress+Saline      | 735, 51                                                          | 6 (1,5)                       |
| 2/4                     | Pre-stress+Ket-r       | 830, 56                                                          | 6 (3,3)                       |
| 2                       | RS+Vector+Saline       | 1439, 94                                                         | 10 (6,4)                      |
| 2/7                     | RS+CNO                 | 946, 58                                                          | 6 (6,0)                       |
| 2                       | RS+PV-Ex               | 1384, 93                                                         | 10 (6,4)                      |
| 2                       | RS+PV-In               | 1264, 87                                                         | 9 (6,3)                       |
| 2                       | PV-Ex                  | 615, 53                                                          | 5 (4,1)                       |
| 2                       | PV-In                  | 472, 36                                                          | 4 (3,1)                       |
| 2                       | RS+PV-Ex+Ket-r         | 777, 49                                                          | 5 (0,5)                       |
| 2                       | RS+PV-In+Ket-r         | 638, 50                                                          | 5 (3,2)                       |
| 2                       | RS+SST-In              | 696, 50                                                          | 5 (3,2)                       |
| 2                       | RS+VIP-In              | 789, 51                                                          | 6 (6,0)                       |
| 7                       | RS+Vector+Saline       | 768, 54                                                          | 6 (4,2)                       |
| 7                       | RS+PV-Ex               | 837, 60                                                          | 6 (4,2)                       |
| 7                       | RS+PV-In               | 743, 51                                                          | 5 (3,2)                       |
| 7                       | RS+SST-In              | 676, 49                                                          | 5 (3,2)                       |
| 7                       | RS+VIP-In              | 744, 50                                                          | 6 (5,1)                       |
| 2                       | (Isoflurane) RS+Saline | 721, 53                                                          | 6 (4,2)                       |
| 2                       | (Isoflurane) RS+Ket-r  | 1107, 76                                                         | 8 (7,1)                       |
| 7                       | (Isoflurane) RS+Saline | 518, 35                                                          | 4 (3,1)                       |
| 7                       | (Isoflurane) RS+Ket-r  | 598,39                                                           | 4 (3,1)                       |

**Supplementary Table 2.** Analysis details for PV bouton imaging, including the number of PV bouton analyzed and the number and sex of animals used in different groups.

| Imaging interval (days) | Group     | Number of analyzed PV boutons on Day 0 | Number of mice (Male, Female) |
|-------------------------|-----------|----------------------------------------|-------------------------------|
| 1/2/5/7                 | Control   | 1131                                   | 5 (3,2)                       |
| 1/2/5/7                 | RS+Saline | 1429                                   | 6 (3,3)                       |
| 1/2/5/7                 | RS+Ket-r  | 953                                    | 5 (2,3)                       |

**Supplementary Table 3.** Table showing the number the number and gender of animals used in different groups in behavioral test.

| Group         | Number of mice (Male, Female) |
|---------------|-------------------------------|
| RS+Saline     | 9 (9, 0)                      |
| RS+Ket        | 10 (5, 5)                     |
| RS+CNO        | 9 (5, 4)                      |
| RS+PV-Ex      | 11 (7, 4)                     |
| Naïve control | 8 (4, 4)                      |

**Supplementary Table 4.** Table showing details of statistical analysis of all figures.

| Figure | Test                | <i>p</i> -value                                                                          | Post-hoc test | <i>p</i> -value (4 decimal places)                                                                   |
|--------|---------------------|------------------------------------------------------------------------------------------|---------------|------------------------------------------------------------------------------------------------------|
| 1c     | Unpaired t-test     | Day 2: $P = 0.0045$                                                                      | NA            | NA                                                                                                   |
| 1c     | Mann–Whitney test   | Day 7: $P = 0.0022$                                                                      | NA            | NA                                                                                                   |
| 1d     | Unpaired t-test     | Day 2: $P = 0.0179$<br>Day 7: $P = 0.0010$                                               | NA            | NA                                                                                                   |
| 1e     | Unpaired t-test     | $P = 0.0005$                                                                             | NA            | NA                                                                                                   |
| 1f     | Unpaired t-test     | $P = 0.0006$                                                                             | NA            | NA                                                                                                   |
| 1g     | Unpaired t-test     | Mushroom: $P < 0.0001$                                                                   | NA            | NA                                                                                                   |
| 1h     | Mann–Whitney test   | Mushroom: $P = 0.0022$                                                                   | NA            | NA                                                                                                   |
| 1g     | Mann–Whitney test   | Stubby: $P = 0.1797$                                                                     | NA            | NA                                                                                                   |
| 1h     | Mann–Whitney test   | Stubby: $P = 0.8182$                                                                     | NA            | NA                                                                                                   |
| 1g     | Unpaired t-test     | Thin: $P = 0.6754$                                                                       | NA            | NA                                                                                                   |
| 1h     | Unpaired t-test     | Thin: $P = 0.5797$                                                                       | NA            | NA                                                                                                   |
| 1i     | Kruskal–Wallis test | Elimination:<br>$P = 0.0004, H = 10.88$                                                  | Dunn’s test   | Control vs. RS:<br>$P = 0.0229$<br>Control vs. 2d RS + 5d Recovery: $P = 0.0102$                     |
| 1i     | One-way ANOVA       | Formation:<br>$P < 0.0001, F_{(2,13)} = 23.39$                                           | Tukey’s test  | Control vs. RS:<br>$P = 0.0006$<br>Control vs. 2d RS + 5d Recovery: $P < 0.0001$                     |
| 2c     | One-way ANOVA       | Day 2:<br>$P = 0.0908, F_{(2,13)} = 2.901$<br>Day 7:<br>$P = 0.3535, F_{(2,13)} = 1.128$ | NA            | NA                                                                                                   |
| 2d     | One-way ANOVA       | Day 2:<br>$P < 0.0001, F_{(2,13)} = 38.78$<br>Day 7:<br>$P < 0.0001, F_{(2,13)} = 22.31$ | Tukey’s test  | Day 2:<br>RS + Saline vs. RS + KET-s:<br>$P < 0.0001$<br>RS + Saline vs. RS + KET-s:<br>$P < 0.0001$ |



|    |                              |                                                                                                                                                                                                                                                                            |                |                                                                                                                    |
|----|------------------------------|----------------------------------------------------------------------------------------------------------------------------------------------------------------------------------------------------------------------------------------------------------------------------|----------------|--------------------------------------------------------------------------------------------------------------------|
|    |                              |                                                                                                                                                                                                                                                                            |                | Day 7:<br>RS + Saline vs. RS + KET-s:<br>$P = 0.1410$<br>RS + Saline vs. RS + KET-s:<br>$P < 0.0001$               |
| 2e | One-way ANOVA                | $P < 0.0001$ , $F_{(2,13)} = 21.22$                                                                                                                                                                                                                                        | Tukey's test   | RS + Saline vs. RS + KET-s:<br>$P = 0.0480$<br>RS + Saline vs. RS + KET-s:<br>$P < 0.0001$                         |
| 2f | One-way ANOVA                | $P = 0.5496$ , $F_{(2,13)} = 0.627$                                                                                                                                                                                                                                        | NA             | NA                                                                                                                 |
| 2g | One-way ANOVA                | Day 2:<br>Mushroom:<br>$P < 0.0001$ , $F_{(2,13)} = 87.99$<br>Stubby:<br>$P = 0.0651$ , $F_{(2,13)} = 3.396$<br>Thin:<br>$P = 0.6504$ , $F_{(2,13)} = 0.4448$<br>Day 7:<br>Stubby:<br>$P = 0.2048$ , $F_{(2,13)} = 1.796$<br>Thin:<br>$P = 0.9637$ , $F_{(2,13)} = 0.0371$ | Tukey's test   | Mushroom:<br>Day 2:<br>RS + Saline vs. RS + KET-s:<br>$P < 0.0001$<br>RS + Saline vs. RS + KET-r:<br>$P < 0.0001$  |
| 2g | Kruskal-Wallis test          | Day 7:<br>Mushroom:<br>$P < 0.0001$ , $H = 12.88$                                                                                                                                                                                                                          | Dunn's test    | Day 7:<br>Mushroom:<br>RS + Saline vs. RS + KET-s:<br>$P = 0.2525$<br>RS + Saline vs. RS + KET-r:<br>$P = 0.0010$  |
| 2j | Unpaired t-test              | Elimination: $P = 0.0161$<br>Formation: $P = 0.0027$                                                                                                                                                                                                                       | NA             | NA                                                                                                                 |
| 2k | Unpaired t-test              | $P = 0.0087$                                                                                                                                                                                                                                                               | NA             | NA                                                                                                                 |
| 2m | Unpaired t-test              | $\leq 2 \mu\text{m}$ : $P = 0.0488$<br>$2-4 \mu\text{m}$ : $P = 0.6756$<br>$\geq 4 \mu\text{m}$ : $P = 0.3469$                                                                                                                                                             | NA             | NA                                                                                                                 |
| 3c | 2-way repeated measure ANOVA | Treatment time:<br>$P < 0.0001$ , $F_{(3, 48)} = 13.92$<br>Injection current:<br>$P < 0.0001$<br>Interaction:<br>$P < 0.0001$                                                                                                                                              | Dunnett's test | Before ketamine vs. 10, 30 or 50 min after ketamine at 50, 100, 150, 200, 150 injection current (pA): $P < 0.0001$ |
| 3h | Unpaired                     | $P = 0.0008$                                                                                                                                                                                                                                                               | NA             | NA                                                                                                                 |

|    |                     |                                                                                             |              |                                                                                                                                                                                                                                                                                                                                                        |
|----|---------------------|---------------------------------------------------------------------------------------------|--------------|--------------------------------------------------------------------------------------------------------------------------------------------------------------------------------------------------------------------------------------------------------------------------------------------------------------------------------------------------------|
|    | t-test              |                                                                                             |              |                                                                                                                                                                                                                                                                                                                                                        |
| 4c | Kruskal-Wallis test | Day 7:<br>$P = 0.0211, H = 7.05$                                                            | Dunn's test  | Control vs. RS + Saline:<br>$P = 0.0242$                                                                                                                                                                                                                                                                                                               |
| 4d | One-way ANOVA       | Day 5:<br>$P = 0.0264, F_{(2, 13)} = 4.869$<br>Day 7:<br>$P = 0.0292, F_{(2, 13)} = 4.696$  | Tukey's test | RS + Saline vs. RS + KET-r:<br>Day 5: $P = 0.0292$<br>Day 7: $P = 0.0393$                                                                                                                                                                                                                                                                              |
| 4e | One-way ANOVA       | Day 5:<br>$P = 0.0080, F_{(2, 13)} = 7.15$<br>Day 7:<br>$P = 0.0010, F_{(2, 13)} = 12.35$   | Tukey's test | Control vs. RS + Saline:<br>Day 5: $P = 0.0069$<br>Day 7: $P = 0.0009$<br>RS + Saline vs. RS + KET-r:<br>Day 7: $P = 0.0173$                                                                                                                                                                                                                           |
| 5c | One-way ANOVA       | Day 2:<br>$P < 0.0001, F_{(3, 31)} = 37.56$<br>Day 7:<br>$P < 0.0001, F_{(3, 19)} = 15.38$  | Tukey's test | Day 2:<br>RS + Vector + Saline vs. RS + CNO<br>$P < 0.0001$<br>RS + Vector + Saline vs. RS + PV-Ex<br>$P = 0.6865$<br>RS + Vector + Saline vs. RS + PV-In<br>$P = 0.0004$<br>Day 7:<br>RS + Vector + Saline vs. RS + CNO<br>$P = 0.1284$<br>RS + Vector + Saline vs. RS + PV-Ex<br>$P = 0.9984$<br>RS + Vector + Saline vs. RS + PV-In<br>$P = 0.0018$ |
| 5d | One-way ANOVA       | Day 2:<br>$P < 0.0001, F_{(3, 31)} = 13.94,$<br>Day 7:<br>$P = 0.2576, F_{(3, 19)} = 1.458$ | Tukey's test | Day 2:<br>RS + Vector + Saline vs. RS + CNO<br>$P < 0.0001$<br>RS + Vector + Saline vs. RS + PV-Ex<br>$P = 0.5258$<br>RS + Vector + Saline vs. RS + PV-In<br>$P = 0.0001$                                                                                                                                                                              |
| 5e | One-way ANOVA       | $P = 0.0904, F_{(2, 12)} = 2.957$                                                           | NA           | NA                                                                                                                                                                                                                                                                                                                                                     |
| 5f | One-way ANOVA       | Day 2:<br>Mushroom:<br>$P < 0.0001, F_{(2, 26)} = 18.23$                                    | Tukey's test | Day 2:<br>Mushroom:<br>RS + Vector + Saline vs.                                                                                                                                                                                                                                                                                                        |

|    |                     |                                                                                                                                                                                                                                                                                                                           |              |                                                                                                                                                                                                                                                                                                          |
|----|---------------------|---------------------------------------------------------------------------------------------------------------------------------------------------------------------------------------------------------------------------------------------------------------------------------------------------------------------------|--------------|----------------------------------------------------------------------------------------------------------------------------------------------------------------------------------------------------------------------------------------------------------------------------------------------------------|
|    |                     | <p>Stubby:<br/> <math>P = 0.3295</math>, <math>F_{(2, 26)} = 1.159</math><br/> Thin:<br/> <math>P = 0.4458</math>, <math>F_{(2, 26)} = 0.8336</math><br/> Day 7:<br/> Stubby:<br/> <math>P = 0.0189</math>, <math>F_{(2, 14)} = 5.336</math><br/> Thin:<br/> <math>P = 0.4404</math>, <math>F_{(2, 14)} = 0.87</math></p> |              | <p>RS + PV-Ex<br/> <math>P = 0.0004</math><br/> RS + Vector + Saline vs.<br/> RS + PV-In<br/> <math>P = 0.3857</math><br/> Day 7:<br/> Stubby:<br/> RS + Vector + Saline vs.<br/> RS + PV-Ex<br/> <math>P = 0.0578</math><br/> RS + Vector + Saline vs.<br/> RS + PV-In<br/> <math>P = 0.8236</math></p> |
| 5f | Kruskal-Wallis test | <p>Day 7:<br/> Mushroom:<br/> <math>P = 0.0007</math>, <math>H = 10.90</math></p>                                                                                                                                                                                                                                         | Dunn's test  | <p>Day 7:<br/> Mushroom:<br/> RS + Vector + Saline vs.<br/> RS + PV-Ex<br/> <math>P = 0.0034</math><br/> RS + Vector + Saline vs.<br/> RS + PV-In<br/> <math>P = 0.8270</math></p>                                                                                                                       |
| 5g | One-way ANOVA       | <p><math>P = 0.0178</math>, <math>F_{(2,13)} = 5.579</math></p>                                                                                                                                                                                                                                                           | Tukey's test | <p>RS + KET-r vs. RS + KET-r + PV-Ex:<br/> <math>P = 0.3558</math><br/> RS + KET-r vs. RS + Ket-r + PV-In:<br/> <math>P = 0.0138</math></p>                                                                                                                                                              |
| 5h | One-way ANOVA       | <p>Mushroom:<br/> <math>P = 0.0236</math>, <math>F_{(2, 13)} = 5.064</math><br/> Stubby:<br/> <math>P = 0.3199</math>, <math>F_{(2, 13)} = 1.246</math></p>                                                                                                                                                               | Tukey's test | <p>Mushroom:<br/> RS + KET-r vs. RS + KET-r + PV-Ex:<br/> <math>P = 0.4971</math><br/> RS + KET-r vs. RS + Ket-r + PV-In:<br/> <math>P = 0.0190</math></p>                                                                                                                                               |
| 5h | Kruskal-Wallis test | <p>Thin:<br/> <math>P = 0.3463</math>, <math>H = 2.241</math></p>                                                                                                                                                                                                                                                         | NA           | NA                                                                                                                                                                                                                                                                                                       |
| 5i | One-way ANOVA       | <p>Day 2:<br/> <math>P = 0.0008</math>, <math>F_{(2, 18)} = 11.02</math><br/> Day 7:<br/> <math>P = 0.0207</math>, <math>F_{(2, 14)} = 5.178</math></p>                                                                                                                                                                   | Tukey's test | <p>Day 2:<br/> RS + Vector + Saline vs.<br/> RS + SST-In:<br/> <math>P = 0.3175</math><br/> RS + Vector + Saline vs.<br/> RS + VIP-In:<br/> <math>P = 0.0005</math><br/><br/> Day 7:<br/> RS + Vector + Saline vs.<br/> RS + SST-In:<br/> <math>P = 0.9629</math></p>                                    |

|           |                   |                                                                                                  |                                          |                                                                                                                                                                                                                                                      |
|-----------|-------------------|--------------------------------------------------------------------------------------------------|------------------------------------------|------------------------------------------------------------------------------------------------------------------------------------------------------------------------------------------------------------------------------------------------------|
|           |                   |                                                                                                  |                                          | RS + Vector + Saline vs. RS + VIP-In:<br>$P = 0.0270$                                                                                                                                                                                                |
| 5j        | One-way ANOVA     | Day 2:<br>$P < 0.0001$ , $F_{(2, 18)} = 18.91$<br>Day 7:<br>$P = 0.0001$ , $F_{(2, 14)} = 17.98$ | Tukey's test                             | Day 2:<br>RS + Vector + Saline vs. RS + SST-In:<br>$P = 0.0001$<br>RS + Vector + Saline vs. RS + VIP-In:<br>$P = 0.0006$<br>Day 7:<br>RS + Vector + Saline vs. RS + SST-In:<br>$P = 0.0010$<br>RS + Vector + Saline vs. RS + VIP-In:<br>$P = 0.0002$ |
| Suppl. 1a | Unpaired t-test   | Day 2: $P = 0.0465$<br>Day 7: $P = 0.3666$                                                       | NA                                       | NA                                                                                                                                                                                                                                                   |
| Suppl. 1b | Unpaired t-test   | Day 2: $P = 0.6867$<br>Day 7: $P = 0.7588$                                                       | NA                                       | NA                                                                                                                                                                                                                                                   |
| Suppl. 2a | One-way ANOVA     | Day 2:<br>$P = 0.5291$ , $F_{(2,14)} = 0.6664$<br>Day 7:<br>$P = 0.0023$ , $F_{(2,14)} = 9.681$  | Tukey's test                             | Day 7:<br>Control vs. RS + KET-s:<br>$P = 0.0145$<br>Control vs. RS + KET-r:<br>$P = 0.5706$                                                                                                                                                         |
| Suppl. 2b | One-way ANOVA     | Day 2:<br>$P = 0.2885$ , $F_{(2,14)} = 1.360$<br>Day 7:<br>$P = 0.0312$ , $F_{(2,14)} = 4.489$   | Tukey's test                             | Day 7:<br>Control vs. RS + KET-s:<br>$P = 0.0457$<br>Control vs. RS + KET-r:<br>$P = 0.0651$                                                                                                                                                         |
| Suppl. 2c | One-way ANOVA     | $P = 0.0019$ , $F_{(2,14)} = 10.19$                                                              | Tukey's test                             | Control vs. RS + KET-s:<br>$P = 0.0015$<br>Control vs. RS + KET-r:<br>$P = 0.3778$                                                                                                                                                                   |
| Suppl. 3a | Unpaired t-test   | Day 2: $P = 0.0480$                                                                              | NA                                       | NA                                                                                                                                                                                                                                                   |
| Suppl. 3a | Mann-Whitney test | Day 7: $P = 0.0286$                                                                              | NA                                       | NA                                                                                                                                                                                                                                                   |
| Suppl. 3b | Mann-Whitney test | Day 2: $P = 0.5495$                                                                              | NA                                       | NA                                                                                                                                                                                                                                                   |
| Suppl. 3b | Unpaired t-test   | Day 7: $P = 0.1389$                                                                              | NA                                       | NA                                                                                                                                                                                                                                                   |
| Suppl. 5  | One-way ANOVA     | $P = 0.0140$ , $F_{(4, 42)} = 3.547$                                                             | Dunnett's test (compared to RS + Saline) | 14-RS + Saline vs. 14-RS + Ket:<br>$P = 0.0245$<br>14-RS + Saline vs. 14-RS + CNO:                                                                                                                                                                   |

|  |  |  |  |                                                                                                                              |
|--|--|--|--|------------------------------------------------------------------------------------------------------------------------------|
|  |  |  |  | $P = 0.8379$<br>14-RS + Saline vs.<br>14-RS + PV-Ex:<br>$P = 0.0282$<br>14-RS + Saline vs.<br>Naive control:<br>$P = 0.0295$ |
|--|--|--|--|------------------------------------------------------------------------------------------------------------------------------|

## Supplementary Method

### **Elevated Plus Maze (EPM)**

An EPM containing two opposing open arms and two opposing closed arms (height: 40 cm, length: 40 cm) forming a cross-shape was used. Each mouse was placed into an EPM facing an open arm and allowed to freely explore for 5 minutes. ANY-maze software (Stoelting, USA) was used for recording and analysis. The number of entries into the open and closed arms was counted.
